# Supplementary material for: Microporous Oxide-Based Surface-Enhanced Raman Scattering Film for Quadrillionth Detection of Mercury Ion (II)
Source: MDPI journal article supplement (doi:10.3390/pr9050794), 2021-04-30
Supplement: s1 [file s1]

# Microporous Oxide-Based Surface-Enhanced Raman Scattering Film for Quadrillionth Detection of Mercury Ion (II)

Sripansuang Tangsuwanjinda <sup>1,2</sup>, Yu-Yu Chen <sup>1</sup>, Ching-Hsiang Lai <sup>1</sup>, Guan-Ting Jhou <sup>1</sup>, Yu-Wei Chiang <sup>1</sup> and Hsin-Ming Cheng <sup>1,2,\*</sup>

<sup>1</sup> Department of Electronic Engineering, Ming Chi University of Technology, New Taipei City, 243, Taiwan; stang.suwanjinda@gmail.com (S.T.); u08157131@mail2.mcut.edu.tw (Y.-Y.C.); u08157149@mail2.mcut.edu.tw (C.-H.L.); u08157113@mail2.mcut.edu.tw (G.-T.J.); u08157145@mail2.mcut.edu.tw (Y.-W.C.)

<sup>2</sup> Organic Electronics Research Center, Ming Chi University of Technology, New Taipei City, 243, Taiwan

\* Correspondence: SMCheng@mail.mcut.edu.tw; Tel.: +886-29089899 (ext. 4867)

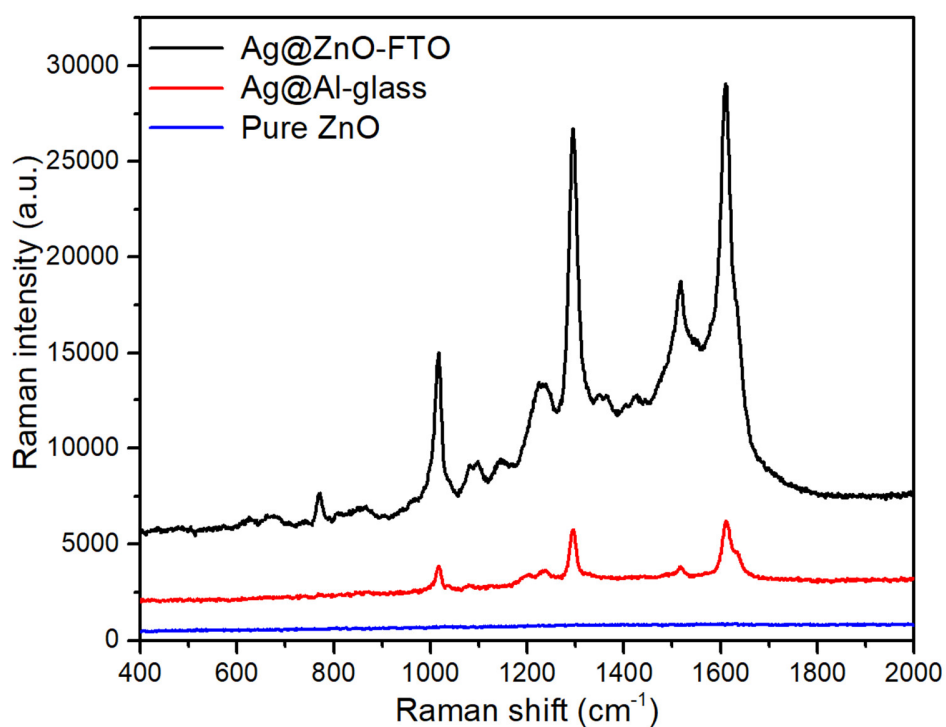

**Figure S1.** The SERS spectra of  $6.4 \times 10^{-4}$  M of DPY on the chips composed by Ag@ZnO-FTO, Ag@Al-glass and ZnO, respectively.

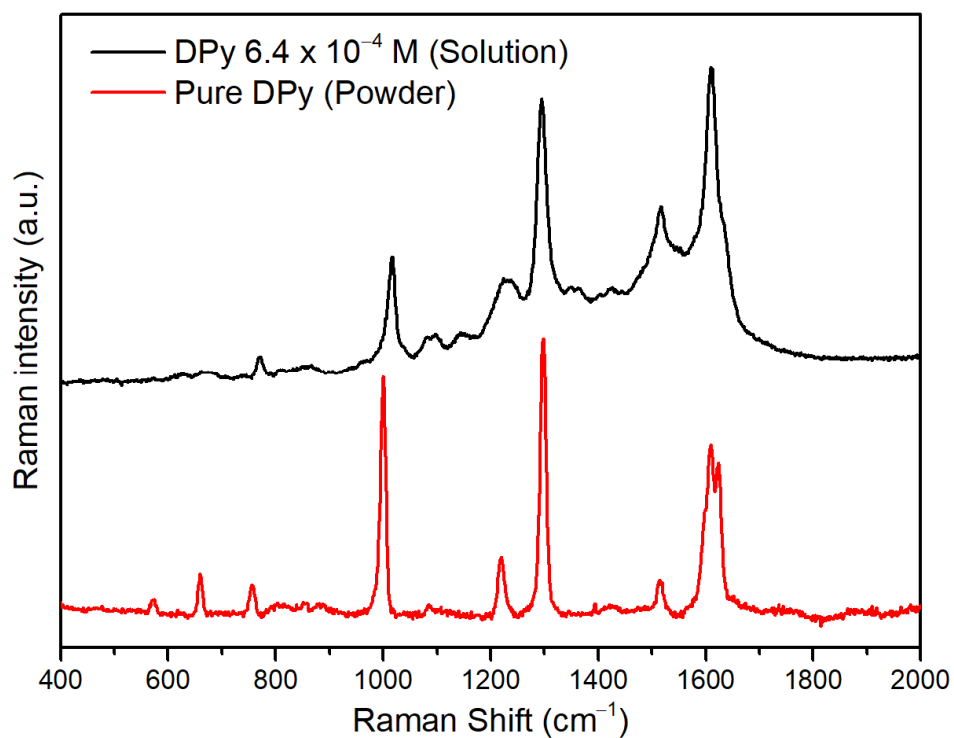

**Figure S2.** Present the differential of Raman results of Raman peaks between pure DPY powders (normal Raman, without SERS effect) and SERS with DPY concentration at  $6.4 \times 10^{-4} \text{ M}$ .

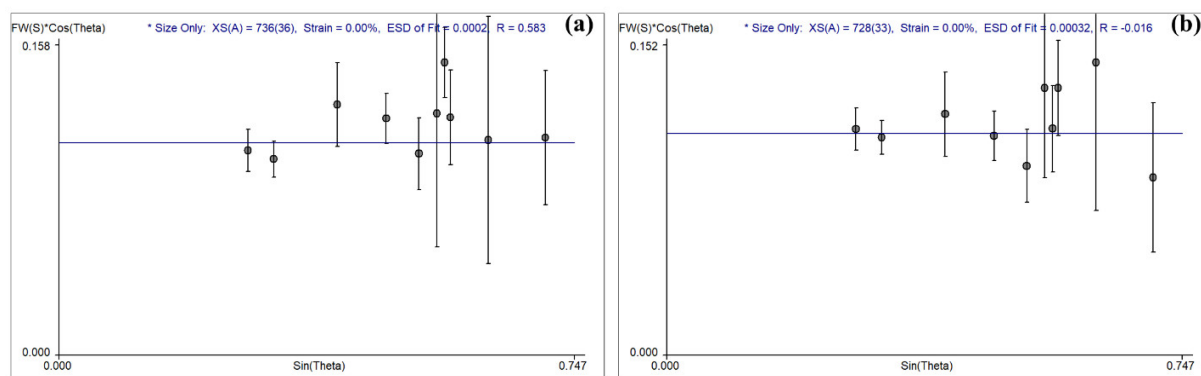

**Figure S3.** Williamson-Hall plot for ZnO diffraction patterns before (a) and after (b) Ag decorated by electrodecoration.

**Table S1.** Present the parameter of AC power supply for electrodecoration process.

| Period   | Time(sec) | Voltage (V) | Frequency (Hz) |
|----------|-----------|-------------|----------------|
| Initial  | 2.00      | 0           | 50             |
| Normal 1 | 0.25      | 9           | 50             |
| Trans 1  | --        | --          | --             |
| Abnormal | 1.00      | 0           | 50             |
| Trans 2  | 0.75      | --          | --             |
| Normal 2 | 3.00      | 0           | 50             |

**Table S2.** Present structure parameters for SnO<sub>2</sub>, ZnO tetrapod nanoparticles and Ag nanoparticles are calculated by Rietveld refinement of the XRD experiment results.

| Element            |    | ZnO                      |       |
|--------------------|----|--------------------------|-------|
| Space group        |    | P6 <sub>3</sub> mc (186) |       |
| Lattice parameters |    | a (Å)                    | 3.25  |
|                    |    | b (Å)                    | 3.25  |
|                    |    | c (Å)                    | 5.21  |
| Element parameters | Zn | x                        | 0.33  |
|                    |    | y                        | 0.67  |
|                    |    | z                        | 20.69 |
|                    | O  | x                        | 0.33  |
|                    |    | y                        | 0.67  |
|                    |    | z                        | 21.08 |
| Lattice symbol     |    | hP                       |       |

| Element            |  | Ag    |      |
|--------------------|--|-------|------|
| Space group        |  | Fm-3m |      |
| Lattice parameters |  | a (Å) | 4.11 |
|                    |  | b (Å) | 4.11 |
|                    |  | c (Å) | 4.11 |
|                    |  | x     | 0    |
|                    |  | y     | 0    |
|                    |  | z     | 0    |
| Lattice symbol     |  | cF    |      |

**Table S3.** Present the vibration modes of Raman and SERS spectra of DPy.

| Wavelength (cm <sup>-1</sup> ) |          | Symbol                                                                                             |
|--------------------------------|----------|----------------------------------------------------------------------------------------------------|
| Powder                         | Solution |                                                                                                    |
| 570                            |          | out-of-plane deformation                                                                           |
| 660                            |          | Ring breathing                                                                                     |
| 757                            | 771      | Ring breathing                                                                                     |
| 883                            |          | γ(C-H)                                                                                             |
| 999                            | 1020     | Ring breathing                                                                                     |
| 1001                           | 1064     | ν(C-C), ν(C-N), δ(C-H)                                                                             |
| 1219                           | 1232     | ν(C-C), ν(C-N), δ(C-H)                                                                             |
| 1298                           | 1299     | ν(C-C), ν(C-N), δ(C-H)                                                                             |
| 1513                           | 1510     | ν(C-C), ν(C-N)                                                                                     |
|                                |          | coupled to the pyridyl ring                                                                        |
|                                |          | C-N stretching, the C-C the opposited stretching vibration and the C-H in-plane bending vibration. |
| 1609                           | 1611     | ν(C-C)                                                                                             |
| 1623                           |          | C-C stretching vibration and the pyridyl ring C-N in-plane bending vibration                       |

ν, stretch; δ, in-plane bend; γ, out-of-plane bend.
